RESEARCH ARTICLE

# Effects of 12-weeks of Brisk Walking on Health-related Physical Fitness, Balance, and Life Satisfaction in Overweight Older Chinese Women: A Cluster Randomized Control Trial

Xiaorong Bai<sup>1,2</sup>, Yuhui Wang<sup>2</sup>, Feifei Chen<sup>2</sup>, Zongqiang Jin<sup>1\*</sup>, Wensheng Xiao<sup>1,2,3\*</sup>, Soh Kim Geok<sup>4\*</sup>

**1** College of Sports Training, Tianjin University of Sport, Tianjin, China, **2** School of Physical Education, Huzhou Normal University, Huzhou, China, **3** College of Physical Education, Hunan Normal University, Changsha, China, **4** Department of Sports Studies, Faculty of Educational Studies, Universiti Putra Malaysia, Serdang Selangor, Malaysia

\* [zongqiangjin@126.com](mailto:zongqiangjin@126.com) (ZJ); [03218@zjhu.edu.cn](mailto:03218@zjhu.edu.cn) (WX); [kims@upm.edu.my](mailto:kims@upm.edu.my) (SKG)

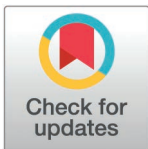

**OPEN ACCESS**

**Citation:** Bai X, Wang Y, Chen F, Jin Z, Xiao W, Geok SK (2026) Effects of 12-weeks of Brisk Walking on Health-related Physical Fitness, Balance, and Life Satisfaction in Overweight Older Chinese Women: A Cluster Randomized Control Trial. *PLoS One* 21(6): e0352243. <https://doi.org/10.1371/journal.pone.0352243>

**Editor:** Zulkarnain Jaafar, Universiti Malaya, MALAYSIA

**Received:** August 8, 2025

**Accepted:** May 8, 2026

**Published:** June 26, 2026

**Copyright:** © 2026 Bai et al. This is an open access article distributed under the terms of the [Creative Commons Attribution License](https://creativecommons.org/licenses/by/4.0/), which permits unrestricted use, distribution, and reproduction in any medium, provided the original author and source are credited.

**Data availability statement:** All relevant data are within the manuscript and its [Supporting Information](#) files.

**Funding:** This study was supported by a project supported by the Education Ministry's Youth Fund Project for Humanities and

## Abstracts

Obesity among the elderly is primarily the result of a lack of exercise. Many people around the world are concerned about how physical activity can improve the life satisfaction and physical health of overweight seniors. As a result, this study aims to investigate how brisk walking impacts the physical fitness, balance, and overall quality of life of overweight senior women in China. This study design based on cluster randomized control trial. 54 older women between the ages of 60 and 69 were randomly assigned to the brisk walking group (n = 27) or the control group (n = 27). The brisk walking group received three times, (35-60) minutes sessions per week for 12 weeks, while the control group kept their daily routine. Data collection at zero week and twelfth week. Results have presented that brisk walking improved ( $p < 0.05$ ) cardiorespiratory fitness, flexibility, muscular strength, muscular endurance, balance, and life satisfaction after 12-weeks intervention, except for body composition. Only the chair stand test of muscular endurance showed a significant difference between the brisk walking group and the control group after 12 weeks of training. Nevertheless, the effect size between the groups was increased after 12 weeks of training. In conclusion, brisk walking promotes health-related physical fitness, balance, and life satisfaction among overweight older women after 12 weeks intervention, except body composition.

## Introduction

Population aging constitutes a defining demographic trend in the global population structure [1]. The proportion of older adults in the global population has reached an unprecedented level, with projections of continuous growth in the coming century,

Social Sciences Research of China: A Social Ecological Study on the “Subject-Time-Space” Three-Dimensional Synergistic Mechanism of Elderly Fitness Development (Grant No. 24YJC890001, grant holder: Xiaorong Bai); the Philosophy and Social Sciences Research Youth Project of Hunan Province: Research on the Construction of Digital Inheritance System for Hunan-Sichuan Sports Culture (Grant No. 24YBQ139, grant holder: Wensheng Xiao); and the annual regular project of the Philosophy and Social Sciences Foundation of Zhejiang Province: Research on the Dual Drive of Sports Culture and Digital-Smart Events for the Path of Common Prosperity in Zhejiang Rural Areas (Grant No. 26NDJC019YBM, grant holder: Wensheng Xiao).

**Competing interests:** The authors have declared that no competing interests exist.

and numerous countries are now confronting profound socioeconomic and public health challenges stemming from this demographic shift [2]. With advancing age, age-associated health morbidities grow increasingly prevalent [3], and overweight and obesity among older adults exert a particularly profound adverse impact on physical health: this condition elevates the risk of chronic non-communicable diseases [4], increased fall risk and impaired mobility [5], diminishes subjective life satisfaction [6], and raises overall mortality risk [7]. Robust evidence links higher levels of physical fitness to reduced all-cause mortality, underscoring its role as a modifiable protective factor [8–10]. Life satisfaction, a core dimension of subjective well-being, it serves as a pivotal indicator of overall well-being in older populations [11,12]. However, the majority of current research focuses on life satisfaction and health related physical fitness separately, with comparatively few studies examining the effects of both on the elderly [13,14].

Fostering healthy aging has become a global public health priority, and regular physical activity is a well-recognized cornerstone for maintaining older adults’ physical health and life satisfaction. Despite this consensus, many older adults lack access to low-barrier, evidence-based physical activity interventions [15]. Prior research has demonstrated that brisk walking effectively enhances cardiovascular function and physical endurance—the capacity to sustain daily physical activity and meet unanticipated physical demands [16]. It also strengthens the musculature of the lower extremities, pelvic girdle and lower trunk, preserves the flexibility of major joints, and may ameliorate postural control [17]. Derived from the most fundamental form of ambulation, brisk walking is a moderate intensity aerobic activity that emphasizes standardized posture, controlled speed and sustained duration, with well-documented synergistic benefits for both physical and mental health [18]. Notably, this activity entails minimal physical strain and a low injury risk, rendering it an optimal physical activity option for middle-aged and older adults [19].

Although brisk walking is a low-cost, high-benefit physical activity for older adults [16], the majority of existing studies have focused on fixed moderate-intensity protocols, leaving a critical research gap in the development of intensity-progressive brisk walking interventions tailored to the specific physiological and health needs of vulnerable older adult subgroups [20–22]. Studies have demonstrated that consistent, measurable increases in difficulty force muscles to expand and adapt. Progressive intensity training, on the other hand, can help with conditions like fibromyalgia and sarcopenia by boosting strength and reducing fatigue [23,24]. Two experimental walking intensities have been shown in earlier research: the first involved walking for 15 minutes at a time with 50–70% HR reserve, rising by 5 minutes per week until the patient was able to walk continuously for 30 minutes (week 4) [22]. An alternative strategy is to begin at 40% of the maximum heart rate, progressively raise it to 60% to 80% of the maximum heart rate, and keep it there for the duration of the study [25]. Specifically, there is a dearth of empirical evidence on how a structured, incrementally increasing brisk walking program (with a 5–10% intensity boost every two weeks) impacts the multidimensional health of overweight older Chinese women—a demographic with elevated susceptibility to physical fitness decline,

balance impairments and reduced life satisfaction, and one that has been understudied in existing brisk walking intervention research. To address this gap, the present cluster randomized controlled trial investigated the effects of a 12-week progressive intensity brisk walking intervention on three key outcomes (health-related physical fitness, balance and life satisfaction) in this specific population. Findings from this study aim to provide evidence-based, targeted insights for the design of accessible physical activity interventions, and to fill the empirical gap in tailored brisk walking programs for overweight older Chinese women to promote healthy aging.

## Methods

### Study design

A Cluster Randomized Controlled Trial (CRCT) for this study design. Registered an account from ClinicalTrials.gov and got permission (Approval number: NCT04936672, detail has showed in [S1 File](#)), and first trial registration in the format 23/06/2021. The CONSORT declaration guided the study's design and reporting [26]. Sample size calculations typically take into account type error I ( $\alpha$ ) = 0.05, power (1- $\beta$ ) = 0.80 [27], and most studies use G\*Power 3.1 to determine the minimum sample size, which comes out to be 52 people [28,29]. A total of 54 individuals should be included in this study, taking into account the effect design and pre-estimated 2–5% dropout rate. Of the 52 (96.3%) were included in the final intention-to-treat (ITT) analysis; two subjects were eliminated because they withdrew from the study in the middle.

The following were the inclusion and exclusion criteria for the two groups: The following conditions must be met for inclusion: older women with sedentary (defined as spending six or more hours a day sitting or lying down with little or no physical activity) [30] or inactive lifestyles (It generally means not meeting the recommended 150+ minutes of weekly moderate-intensity exercise) [31]; the Physical Activity Readiness Questionnaire indicating obvious health [32]; Surgery history and recent physical activity within the previous six months are exclusion factors.

There are no ethical issues associated with this study, all volunteers were fully informed about the procedure and written informed consent was obtained before testing and intervention. Moreover, this study involving human participants were reviewed and approved by Universiti Putra Malaysia Ethics Committee (Protocol number: JKEUPM-2020–296, details were provided in the [S3](#) and [S4 Files](#)). Our recruitment period began from June 21st, 2021, to June 24th, 2021. Provide participants with written Informed Consent Forms. The main training started between July 5, 2021, and September 26, 2021. Recruiting from two elderly centers were selected from Puyang city, Henan province, with residents ages ranging from 60 to 69 years, 59 participants were recruited, five participants do not meet the criteria, and finally participants (n=54) randomly assign into brisk walking (n=27) and control group (n=27). The details have shown in [Fig 1](#).

### Blinding and Assignment

This study is CRCT to prevent contamination, the researcher randomly assigned a number for each center and center managers draw lots, with 1 representing the training group and 2 representing the non-training group. Prior to signing the informed consent form, the participants were unaware of the intervention content. The assessor was unaware of the group they were being assessed against.

### Intervention and Control Sections

The intervention followed a standard of exercise by ACSM which is FITT (Frequency, Intensity, Time, Type of exercise) [33]. The Frequency is 3 times per week, intensity is moderate-intensity exercise (50–70% of HRmax) the maximal heart rate (MHR) was calculated with the equation of Tanaka [ $FC_{max} = (220 - \text{age}) * (0.5 - 0.7)$ ] [34] (Applying the finger touch pulse method throughout training. To maintain the stability of the workout level, the coach regularly reminds us to take our pulse. Using your index and middle fingers, gently press the side of the carotid artery or the inside side of the radial artery for fifteen seconds. To find the heart rate per minute, count the number of pulses and multiply the result by four),

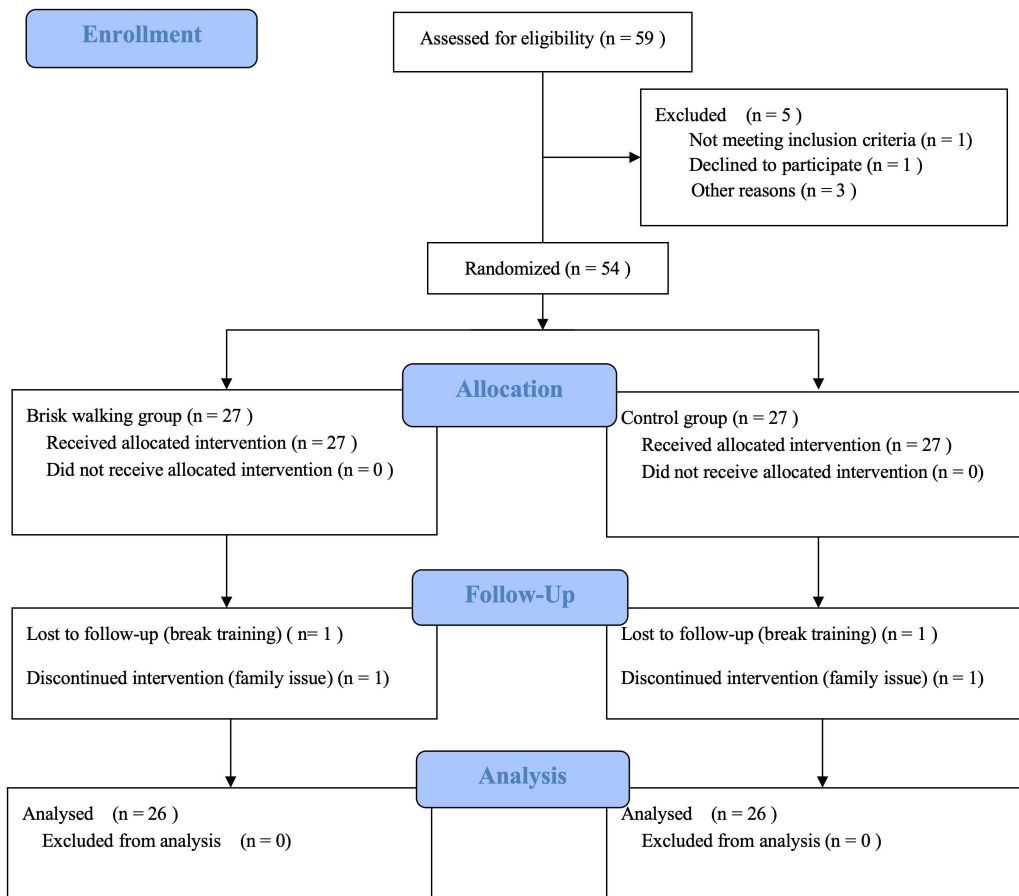

**Fig 1. Participants' flow diagram.**

<https://doi.org/10.1371/journal.pone.0352243.g001>

and another way of determining moderate intensity is the 1–10 Rating of Perceived Exertion (1–10 RPE), after they have finished cooling down, complete the RPE 10 questionnaire while the monitor watches [35]. Time of the exercise intervention was 12 weeks. Per session time between 35 and 60 minutes, include 10 minutes warm-up and 5 minutes cool-down (Table 1). Type of exercise is brisk walking. The specifics are provided in Table 1. All procedures were carried out at Free Square in the early morning (between 6:00 and 7:00 a.m.), under the supervision of three people who completed the intervention portion. Participants had to refrain from increasing their physical activity, eat healthfully, abstain from alcohol and caffeinated beverages, and obtain plenty of sleep. To make sure the participants were not influenced by other forces, the monitor would ask each participant about their food, sleep patterns, and level of exercise on Fridays of every week. The monitor would just ask about food, sleep, and exercise schedule for the control group. If a member missed more than six sessions or failed to follow the dietary rules three times, they would be eliminated from the program.

### Risk Management Strategies Implemented

Typically, three approaches are used to guarantee athletes' safety: Pre-exercise screening is the first. Before exercising, the Physical Activity Readiness Questionnaire is used to make sure the exercisers are in good health ("No" was the response for every choice). To assure their safety, the physical state of the exercisers is asked about any obvious symptoms, such as nausea or dizziness, prior to the commencement of each exercise. Real-time monitoring comes in second.

**Table 1. Content of intervention.**

| Week      | Time (min) |                                  |           |          | Intensity                     |
|-----------|------------|----------------------------------|-----------|----------|-------------------------------|
|           | Warm-up    | Basic content                    | Cool-down | Duration | HRmax & RPE 10                |
| 1st-2nd   | 10         | 7.5 min-Rest for 5 min-7.5 min   | 5         | 35       | HRmax (50%–55%); RPE10 (5-6)  |
| 3rd-4th   | 10         | 10 min-Rest for 5 min-10 min     | 5         | 40       | HRmax (55%–60%); RPE10 (5-6)  |
| 5th-6th   | 10         | 12.5 min-Rest for 5 min-12.5 min | 5         | 45       | HRmax (60%–65%); RPE 10 (6-7) |
| 7th-8th   | 10         | 15 min-Rest for 5 min-15 min     | 5         | 50       | HRmax (60%–65%); RPE 10 (6-7) |
| 9th-10th  | 10         | 17.5 min-Rest for 5 min-17.5 min | 5         | 55       | HRmax (65%–70%); RPE10 (6-7)  |
| 11th-12th | 10         | 20 min-Rest for 5 min-20 min     | 5         | 60       | HRmax (65%–70%); RPE 10 (6-7) |

<https://doi.org/10.1371/journal.pone.0352243.t001>

The coach should choose anti-slip flooring, adequate lighting, and steer clear of high-temperature or high-humidity areas. They should also question the person at any point during the brisk walking procedure if they are feeling fatigued, light-headed, or experiencing any other pain. Thirdly, the chosen location is 500 meters from a health clinic. The teachers are skilled in cardiac resuscitation, and the fitness centers have basic first aid kits. At the same time, certain criteria—such as severe dyspnea, aberrant heart rate, or chest pain—are established for withdrawal from the trial.

### Outcome measures

The specific operational measures were measured by citing the “Health-related physical fitness assessment manual” [36], “Chinese National Physical Fitness Test Standard Manual” [37], and “Senior Fitness Test Manual Second Edition” [38]. The testing process and standards are carried out in accordance with the standards of ACSM testing [39].

The parameters include cardiorespiratory fitness (systolic pressure, diastolic pressure, resting heart rate, and vital capacity), body compositions (waist-hip-ratio), flexibility (sit and reach and back scratch), muscular fitness (handgrip strength, arm curl, and chair stand), balance (one legged stance with eyes closed), and life satisfaction (satisfaction with life scale [40]).

The baseline (T0) and study end (T12) assessments of these parameters were conducted. Following a brief warm-up, the participants underwent the following steps of the test. Initially, on the day of enrollment, each participant first had to finish all familiarization test. The coach emphasized that no high-intensity exercise should be allowed 24 hours prior to evaluating all the signs, in addition to keeping a light diet, getting enough sleep, and drinking enough water. It is absolutely forbidden to drink alcohol. Thirdly, the tests were carried out over the course of two days, with the experimental group participating on the first day and the control group on the second, all at the same time of day (that is, between 6:00 and 9:00). The research team’s coaches and physical education teachers performed each assessment.

### Data analysis

Descriptive statistics were used to present the demographic characteristics of the total population in the two groups. The homogeneity of two groups for demographics and outcome variables at baseline was examined using two-tailed independent samples t-test. A generalized estimating equation analysis was conducted, followed by Bonferroni correction for pairwise comparison. The effect size (ES) (Cohen d) was interpreted as follows: trivial, <0.2; small, 0.20 to 0.50; moderate, 0.50 to 0.8; and large, >0.8 [41]. A p-value less than 0.05 was considered statistically significant. IBM SPSS Statistics software for Mac (Version 27; IBM Corporation, Somers, NY, United States) was used for statistical analysis.

### Results

Of the 52 participants who remained in analyses (Fig 1), two of volunteers discontinue attended training caused by them needed to take care of their grandson. the average age was  $63.876 \pm 2.922$  and  $63.964 \pm 2.441$  years, height were

157.827 ± 4.598 and 158.685 ± 4.311, weight were 65.7926 ± 5.792 and 65.801 ± 6.937, education level was 6.885 ± 4.288 and 8.577 ± 4.178, in control group and brisk walking respectively. No significant between-group differences were observed in the participant characteristics at baseline (Table 2).

Table 3 summarizes the results of the test batteries. Briefly, after 12 weeks training, brisk walking improved significantly on cardiorespiratory fitness, muscular fitness, flexibility, balance, and life satisfaction, except body composition (Fig 2). Overall, after 12 weeks, brisk walking had a moderate effect on the VC ( $p < 0.05$ , ES = 0.53), CS ( $p < 0.05$ , ES = 0.68), balance ( $p < 0.05$ , ES = 0.75), and life satisfaction ( $p < 0.05$ , ES = 0.65). Moreover, brisk walking had a small training effect on DBP ( $p < 0.05$ , ES = 0.27), SBP ( $p < 0.05$ , ES = 0.41), RHR ( $p < 0.05$ , ES = 0.39), SR ( $p < 0.05$ , ES = 0.29), BS ( $p < 0.05$ , ES = 0.29), HGS ( $p < 0.05$ , ES = 0.36), AC ( $p < 0.05$ , ES = 0.37). At 12 weeks, brisk walking group significantly outperformed the control group on measure of CS of muscular fitness ( $p < 0.05$ ). Compared to control group, 12-week brisk walking had a large training effect on the CS ( $p < 0.05$ , ES = 0.94), moderate training influence on the SBP ( $p > 0.05$ , ES = 0.54), VC ( $p > 0.05$ , ES = 0.65), HGS ( $p > 0.05$ , ES = 0.53), AC ( $p > 0.05$ , ES = 0.54), and balance ( $p > 0.05$ , ES = 0.64). Additionally, small training effect on DBP ( $p > 0.05$ , ES = 0.15), RHR ( $p > 0.05$ , ES = 0.39), SR ( $p > 0.05$ , ES = 0.29), BS ( $p > 0.05$ , ES = 0.25), and life satisfaction ( $p > 0.05$ , ES = 0.34).

## Discussion

This study found that 12 weeks of moderate intensity brisk walking improved health-related physical fitness, balance, and life satisfaction except for body composition. This finding could assist the elderly enhance their physical fitness and quality of life. Furthermore, the overall findings are consistent with prior research.

In this research, 12 weeks of moderate-intensity brisk walking was found to reduce diastolic blood pressure 1.77 mm Hg, systolic blood pressure 2.66 mm Hg, heart rate 2.07 beats/minute, and increase VC 195 ml. All those indicators were improved by brisk walking, this is because when we start exercising, the body's demand for blood supply and oxygen will increase. During this process, the lungs inhale oxygen, the heart pumps blood, and the blood carries oxygen to all parts of the body through the blood circulation system (Your lungs and exercise). This finding has been confirmed by previous studies, three months of traditional exercise-based lifestyle intervention (Aerobic exercise training, dynamic resistance exercise training, combined aerobic and dynamic resistance exercise training, and isometric exercise training) can result in a reduction in blood pressure of approximately 5 mm Hg systolic [42]. Another study demonstrated a reduction of RHR regardless of any speed walking [43,44]. Distinct walking intensities have distinct effects on RHR. After 12 weeks of brisk walking (60 minutes each session, three times a week, individuals with essential hypertension experienced significant reductions in RHR of 3.6, 8.7 and 11.3 beats per minute, respectively [45]. Previous studies have shown that different walking (fast walking, stepper walking, walking on a treadmill combined with incentive spirometry and Nordic walking) improves VC are consistent with earlier research [46]. Therefore, increasing the intensity and duration of brisk walking every two weeks to improve cardiorespiratory fitness in older overweight women merits greater attention and discussion.

Table 2. Participants' demographics.

| Variables         | CG              | BW              | p     |
|-------------------|-----------------|-----------------|-------|
|                   | M (SD)          | M (SD)          |       |
| Age (year)        | 63.876 (2.922)  | 63.964 (2.441)  | 0.166 |
| Height (cm)       | 157.827 (4.598) | 158.685 (4.311) | 0.402 |
| Weight (kg)       | 65.792 (5.314)  | 65.801 (6.937)  | 0.463 |
| Education (years) | 6.885 (4.288)   | 8.577 (4.178)   | 0.183 |

Note: CG, control group; BW, brisk walking; M, mean; SD, standard deviation.

<https://doi.org/10.1371/journal.pone.0352243.t002>

**Table 3. Effects of brisk walking on health-related physical fitness, balance, and life satisfaction.**

| Test battery              | Time       |                    | Measurement          |                   | Between group |      | Within group d<br>(T0 vs. T12) |      |
|---------------------------|------------|--------------------|----------------------|-------------------|---------------|------|--------------------------------|------|
|                           |            |                    | CG                   | BW                | p             | d    | CG                             | BW   |
|                           |            |                    |                      |                   |               |      |                                |      |
| Cardiorespiratory fitness | DBP (mmHg) | T0                 | 74.420 (7.951)       | 77.230 (6.408)    | 0.917         | 0.39 | 0.01                           | 0.27 |
|                           |            | T12                | 74.380 (7.343)       | 75.460 (6.629) *  | 1.000         | 0.15 |                                |      |
|                           | SBP (mmHg) | T0                 | 125.040 (6.750)      | 125.310 (7.63)    | 1.000         | 0.04 | 0.10                           | 0.41 |
|                           |            | T12                | 125.690 (6.285)      | 122.650 (4.931) * | 0.288         | 0.54 |                                |      |
|                           | RHR (bpm)  | T0                 | 73.690 (8.423)       | 73.920 (6.112)    | 1.000         | 0.03 | 0.08                           | 0.39 |
|                           |            | T12                | 74.350 (7.869)       | 71.850 (4.469) *  | 0.905         | 0.39 |                                |      |
| VC (mL)                   | T0         | 2315.770 (474.613) | 2355.120 (394.849)   | 1.000             | 0.09          | 0.03 | 0.53                           |      |
|                           | T12        | 2302.460 (419.138) | 2550.120 (337.729) * | 0.917             | 0.65          |      |                                |      |
| Body composition          | WHR        | T0                 | 0.910 (0.039)        | 0.910 (0.027)     | 1.000         | 0.01 | 0.01                           | 0.01 |
|                           |            | T12                | 0.910 (0.040)        | 0.910 (0.019)     | 1.000         | 0.02 |                                |      |
| Flexibility               | SR (cm)    | T0                 | 3.781 (6.530)        | 3.708 (8.781)     | 1.000         | 0.01 | 0.03                           | 0.29 |
|                           |            | T12                | 4.012 (6.804)        | 6.346 (9.205) *   | 1.000         | 0.29 |                                |      |
|                           | BS (cm)    | T0                 | -6.904 (9.517)       | - 7.077 (8.685)   | 1.000         | 0.02 | 0.01                           | 0.29 |
|                           |            | T12                | -6.800 (9.051)       | - 4.558 (8.730) * | 1.000         | 0.25 |                                |      |
| Muscular fitness          | HGS (kg)   | T0                 | 22.158 (3.547)       | 22.819 (3.955)    | 1.000         | 0.18 | 0.08                           | 0.36 |
|                           |            | T12                | 22.427 (2.984)       | 24.188 (3.590) *  | 0.299         | 0.53 |                                |      |
|                           | AC (rep)   | T0                 | 19.650 (3.622)       | 20.040 (4.181)    | 1.000         | 0.01 | 0.02                           | 0.37 |
|                           |            | T12                | 19.580 (3.075)       | 21.620 (4.373) *  | 0.284         | 0.54 |                                |      |
|                           | CS (rep)   | T0                 | 17.580 (3.466)       | 18.690 (3.564)    | 1.000         | 0.32 | 0.13                           | 0.68 |
|                           |            | T12                | 18.000 (3.072)       | 21.120 (3.570) *# | 0.003         | 0.94 |                                |      |
| Balance                   | OLS (sec)  | T0                 | 3.723 (2.085)        | 3.720 (1.815)     | 1.000         | 0.01 | 0.04                           | 0.75 |
|                           |            | T12                | 3.818 (2.294)        | 5.335 (2.432) *   | 0.110         | 0.64 |                                |      |
| Life satisfaction         | LS         | T0                 | 27.650 (3.566)       | 28.120 (2.718)    | 1.000         | 0.15 | 0.23                           | 0.65 |
|                           |            | T12                | 28.580 (4.383)       | 29.810 (2.498) *  | 1.000         | 0.34 |                                |      |

**Note:** CG, control group; BW, brisk walking; T0, pre-intervention test; T12, 12-week post-intervention test; DBP, diastolic blood pressure; SBP, systolic blood pressure; RHR, resting heart rate; VC, vital capacity; WHR, waist-to-hip ratio; SR, sit and reach; BS, back scratch, HGS, handgrip strength; AC, arm curl; CS, chair stand; OLS, one legged stand with eyes closed; LS, life satisfaction; \*, within-group differences between T0 and T12,  $p < 0.05$ ; #, BW vs. CG,  $p < 0.05$ .

<https://doi.org/10.1371/journal.pone.0352243.t003>

Aging causes in changes to the body’s composition, including a loss of muscle mass, an increase in adiposity, and penetration of muscle fat by fat [47,48]. Obesity is one of the most serious public health issues of the 21st century [49], and is more prevalent among elderly women [50]. The definition of obesity is related to body composition [51]. WHR is a critical metric for assessing obesity. WHR analyzes the risk of diabetes, hypertension, and cardiovascular metabolic disease associated with obesity [52]. Long-term activity (i.e., jogging, walking, Tai Chi, or swimming) can help maintain a healthy body and lower the risk of obesity [53]. According to a study BW have a minor effect on the body fat and body composition of the elderly [54]. This corresponds with the findings of this study. While the benefits of BW in maintaining fitness are apparent, it is still necessary to combine nutrition with targeted activity to minimize WHR. This can help to reduce all-cause mortality caused by rising WHR [55]. Hence, it may take longer persistence and the combination with nutrition to relieve the obesity issue of the elderly.

Aging reduces flexibility due to the natural aging process. This happens for a number of causes, including water loss in tissue and spine, increased joint stiffness, and elasticity loss in the entire tendon and surrounding tissues [56]. Because no stretching occurs before to or during BW, it is doubtful that BW causes changes in flexibility [57]. A study has

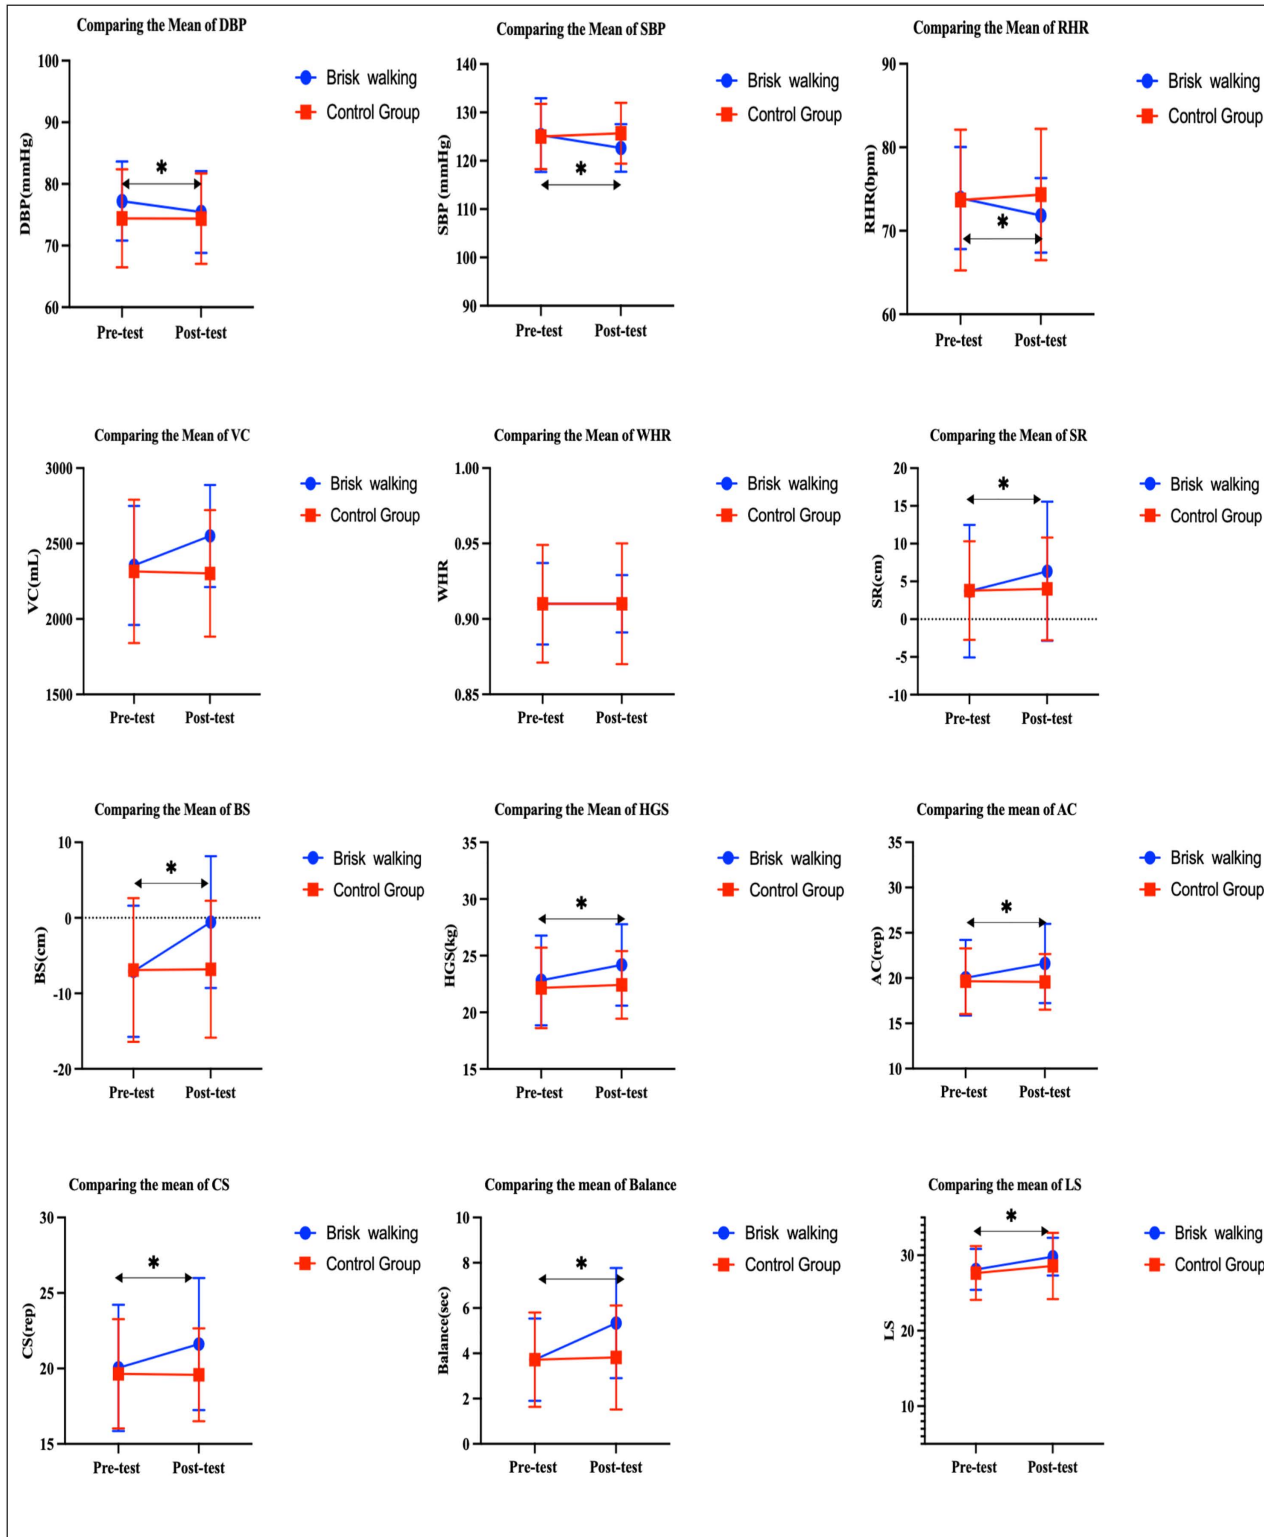

Fig 2. Comparing the mean and standard deviations of brisk walking and control groups before and after 12 weeks of training.

<https://doi.org/10.1371/journal.pone.0352243.g002>

shown that 12-weeks of brisk walking did not enhance flexibility in the elderly [22]. However, this study found that BW can enhance flexibility (SR and BS) for 12 weeks period, three times a week for 35–60 minutes. Research has demonstrated that stretching exercises aid in the improvement of flexibility [57]. Therefore, the change in flexibility is associated to stretching or not. Stretching links were used before and after the experiment to activate muscle elasticity and change muscle flexibility. Muscle stretching should be incorporated to the walking activity to enhance the flexibility of all regions of the body. As a result, seniors' flexibility will increase with brisk walking and static muscular stretching before and after exercise.

With increasing age, the strength of the handgrip and quadriceps muscles deteriorates [58]. The handgrip is also associated with multimorbidity, regardless of whether diabetes is included in the morbidity load [59–62]. As the number of comorbid conditions increases, handgrip decreases. The association between handgrip and mortality is frequently utilized to emphasize the critical nature of resistance exercise in physical activity [63]. Thus, one of the most important aspects of keeping older adults physically functional is increasing grip strength through exercise training. The findings of this study suggest that 12 weeks of walking training can improve grip strength by 1.369 kg, similar study has shown that BW (60 minutes, three times a week for 12 weeks at 60% of heart rate reserve) can improve left and right handgrips [64]. Additionally, aging is caused by a variety of functional changes that result in a significant decline in all human capabilities, especially muscular strength and muscular endurance [65]. Muscular strength and endurance are associated with daily mobility. Increases in lean body tissue, bone mineral density, connective tissue strength, anaerobic power, low-back health, and self-esteem are all benefits of physical fitness development [66]. In this regard, our study demonstrates a notable enhancement of 1.58 rep ( $d=0.37$ ) in the AC and 2.43 rep ( $d=0.68$ ) in the CS indicating its superiority over the practice of before walking exercise. Prior research has shown that 12 weeks of walking training (60 minutes, three times a week for 12 weeks at 60% of heart rate reserve) improve upper and lower muscular strength and endurance explicitly [16]. Thus, BW can be used as an approach to develop muscle strength and endurance in the overweight older women.

Weak balance is a significant factor in the development of falls in the elderly [67]. Falls among the elderly is a significant global public health problem [68]. Fall prevention and balance improvement are global health concerns. Meanwhile, the WHO recommends 150 minutes of moderate-intensity physical exercise each week as beneficial to health and balance [69]. Previous research found that brisk walking promotes balance [70–73]. Similar to the previous study, this study confirmed that brisk walking improves 1.615 seconds ( $d=0.75$ ) in the one leg standing of balance. Nonetheless, several investigations found no effect on balance [22,64]. Interventions in studies do not always result in the desired outcome [74]. Additionally, a limited sample size influences the findings [22]. A study has indicated that 12 weeks leg training improved lower limb strength may lead to balance enhancement in neurologically intact older adults [75]. Many studies have shown that walking can enhance lower limb strength [76–79]. Thus, BW can be used as a kind of exercise to enhance balance, however it requires a long amount of time to retain its effectiveness.

Previous research indicated that after six months of brisk walking, life satisfaction increased. In this study just 12-weeks improved life satisfaction. Hence, shorter period promote life satisfaction in older adults is possible. Life satisfaction is associated with health, mortality, and successful aging in older adults, particularly as the years' pass [80]. Previous research established a positive correlation between physical activity and life satisfaction and happiness in older [81]. Life satisfaction is a measure of well-being that incorporates mood, relationship satisfaction, goal attainment, self-concepts, and self-perceived ability to cope with daily life [82]. Additionally, satisfaction with one's physical appearance, social or familial relationships, and financial situation may all contribute to overall life satisfaction [81]. When it comes to aging, the elderly's health situation has the greatest impact on life satisfaction [83]. Thus, it is critical in this field to analyze a variety of criteria to determine the influence of BW on life satisfaction.

### Limitation and Recommendation for Future Study

This study has several limitations that should be considered when interpreting the results.

Firstly, antihypertensive medication use was not included as an inclusion or exclusion criterion, meaning participants may have been on stable antihypertensive regimens throughout the 12-week intervention period. Although all blood pressure measurements were conducted under standardized conditions in line with American Heart Association guidelines, residual confounding from antihypertensive medications may still influence baseline blood pressure levels and post-intervention changes. This confounding factor could affect the interpretation of blood pressure outcomes, as medication use directly impacts blood pressure regulation and may mask or alter the true effects of the progressive intensity brisk walking intervention on blood pressure. Future studies should consider stratifying participants by antihypertensive medication use or controlling for this variable in statistical analyses to reduce potential confounding and enhance the validity of blood pressure-related findings.

Secondly, the exercise intensity in this study was a 5% increase in maximum heart rate every two weeks and a 5-minute increase in duration. However, the study only measured the change in the relevant indicators after 12 weeks and did not measure the effect of the change cycle. Subsequent studies can quantify the impact indicators at various time intervals and track their changes.

Thirdly, there are no comparisons with the exercise group that does not change moderate intensity during training. Only the control and experimental groups are examined in this study. It is therefore difficult to predict which form of intervention will have the biggest effect on the health of older adults. Nevertheless, the results of this study have a significant influence on the health of the elderly, and further investigation might evaluate the effectiveness of various intervention strategies by contrasting the two design approaches.

## Conclusion

In conclusion, a 12-week progressive brisk walking intervention significantly improves health-related physical fitness, balance, and life satisfaction among overweight older women. These improvements are clinically meaningful, as better physical fitness and balance directly reduce fall risk and maintain functional independence, while higher life satisfaction reflects enhanced overall well-being in later life. The structured design of this program — involving moderate-intensity exercise with a 5% intensity increase every two weeks and gradual extension of walking duration — appears both safe and effective for this vulnerable population. Accordingly, progressive brisk walking protocols can be strongly recommended as a feasible, low-barrier exercise strategy for health practitioners, community aging programs, and older adults themselves. Widespread implementation of such evidence-based interventions holds meaningful long-term public health value for supporting healthy aging and managing the challenges of population aging worldwide.

## Supporting information

### S1 File. Trial Study Protocol.

(PDF)

### S2 File. CONSORT-2010-Checklist.

(DOCX)

### S3 File. Ethic.

(PDF)

### S4 File. Research Protocol for Ethic.

(DOCX)

## Acknowledgments

Thanks to all who participated in this experiment, including participants, evaluators, coaches, and managers of senior institute.

## Author contributions

**Conceptualization:** Wensheng Xiao.

**Data curation:** Wensheng Xiao.

**Formal analysis:** Wensheng Xiao.

**Funding acquisition:** Wensheng Xiao.

**Investigation:** Feifei Chen.

**Methodology:** Feifei Chen.

**Project administration:** Xiaorong Bai.

**Resources:** Xiaorong Bai.

**Software:** Yuhui Wang, Feifei Chen, Soh Kim Geok.

**Supervision:** Xiaorong Bai.

**Validation:** Yuhui Wang, Zongqiang Jin.

**Visualization:** Xiaorong Bai.

**Writing – original draft:** Xiaorong Bai, Soh Kim Geok.

**Writing – review & editing:** Xiaorong Bai, Zongqiang Jin, Soh Kim Geok.

## References

- David B, David C, A L. Global Population Aging: Facts, Challenges, Solutions & Perspectives. *Journal of the American Academy of Arts & Sciences*. 2015;144(2):80–92.
- World Health Organization. Ageing and health. World Health Organization. 2025. Accessed 2026 June 11. <https://www.who.int/news-room/fact-sheets/detail/ageing-and-health>
- Zhao RC, Stambler I. The urgent need for international action for anti-aging and disease prevention. *Aging Dis*. 2020;11(1):212–5. <https://doi.org/10.14336/AD.2019.1230> PMID: 32010494
- Park JH, Moon JH, Kim HJ, Kong MH, Oh YH. Sedentary lifestyle: overview of updated evidence of potential health risks. *Korean J Fam Med*. 2020;41(6):365–73. <https://doi.org/10.4082/kjfm.20.0165> PMID: 33242381
- Mitchell RJ, Lord SR, Harvey LA, Close JCT. Associations between obesity and overweight and fall risk, health status and quality of life in older people. *Aust N Z J Public Health*. 2014;38(1):13–8. <https://doi.org/10.1111/1753-6405.12152> PMID: 24494939
- Kuroki M. Life satisfaction, overweightness and obesity. *Intnl J Wellbeing*. 2016;6(2):93–110. <https://doi.org/10.5502/ijw.v6i2.519>
- Moura L de AN e, Pagotto V, Pereira CC, Oliveira C de, Silveira EA. Does abdominal obesity increase all-cause, cardiovascular. *Multidisciplinary Digital Publishing Institute*. 2022;14(20):4315.
- Faizi N, Kazmi S. Universal health coverage - There is more to it than meets the eye. *J Family Med Prim Care*. 2017;6(1):169–70. [https://doi.org/10.4103/jfmpc.jfmpc\\_13\\_17](https://doi.org/10.4103/jfmpc.jfmpc_13_17) PMID: 29026777
- Erikssen G, Liestøl K, Bjørnholt J, Thaulow E, Sandvik L, Erikssen J. Changes in physical fitness and changes in mortality. *Lancet*. 1998;352(9130):759–62. [https://doi.org/10.1016/S0140-6736\(98\)02268-5](https://doi.org/10.1016/S0140-6736(98)02268-5) PMID: 9737279
- Lee D-C, Sui X, Ortega FB, Kim Y-S, Church TS, Winett RA, et al. Comparisons of leisure-time physical activity and cardiorespiratory fitness as predictors of all-cause mortality in men and women. *Br J Sports Med*. 2011;45(6):504–10. <https://doi.org/10.1136/bjsm.2009.066209> PMID: 20418526
- Malvaso A, Kang W. The relationship between areas of life satisfaction, personality, and overall life satisfaction: An integrated account. *Front Psychol*. 2022;13:894610. <https://doi.org/10.3389/fpsyg.2022.894610> PMID: 36211891
- Ying L, Yang Q. The impact of combat sports on undergraduate students' subjective well-being: chain mediation effects of emotional intelligence and self-esteem. *Front Psychol*. 2025;16:1659084. <https://doi.org/10.3389/fpsyg.2025.1659084> PMID: 40934052
- Boccaccio DE, Censer I, Covinsky KE. Life satisfaction among older adults with impairment in activities of daily living. *Age Ageing*. 2021;50(6):2047–54. <https://doi.org/10.1093/ageing/afab172> PMID: 34510173
- Su Y-J, Hsu C-T, Liang C, Lee P-F, Lin C-F, Chen H-T, et al. Association between health-related physical fitness and self-reported health status in older Taiwanese adults. *BMC Geriatr*. 2022;22(1):235. <https://doi.org/10.1186/s12877-022-02929-4> PMID: 35313813

15. Kilgour AHM, Rutherford M, Higson J, Meredith SJ, McNiff J, Mitchell S, et al. Barriers and motivators to undertaking physical activity in adults over 70—a systematic review of the quantitative literature. *Age Ageing*. 2024;53(4):afae080. <https://doi.org/10.1093/ageing/afae080> PMID: 38651329
16. Bai X, Soh KG, Omar Dev RD, Talib O, Xiao W, Cai H. Effect of Brisk Walking on Health-Related Physical Fitness Balance and Life Satisfaction Among the Elderly: A Systematic Review. *Front Public Health*. 2022;9:829367. <https://doi.org/10.3389/fpubh.2021.829367> PMID: 35174137
17. Morris JN, Hardman AE. Walking to health. *Sports Med*. 1997;23(5):306–32. <https://doi.org/10.2165/00007256-199723050-00004> PMID: 9181668
18. Kwan RY, Lee D, Lee PH, Tse M, Cheung DS, Thiamwong L, et al. Effects of an mHealth Brisk Walking Intervention on Increasing Physical Activity in Older People With Cognitive Frailty: Pilot Randomized Controlled Trial. *JMIR Mhealth Uhealth*. 2020;8(7):e16596. <https://doi.org/10.2196/16596> PMID: 32735218
19. Hootman JM, Macera CA, Ainsworth BE, Martin M, Addy CL, Blair SN. Association among physical activity level, cardiorespiratory fitness, and risk of musculoskeletal injury. *Am J Epidemiol*. 2001;154(3):251–8. <https://doi.org/10.1093/aje/154.3.251> PMID: 11479190
20. Kubo K, Ishida Y, Suzuki S, Komuro T, Shirasawa H, Ishiguro N, et al. Effects of 6 months of walking training on lower limb muscle and tendon in elderly. *Scand J Med Sci Sports*. 2008;18(1):31–9. <https://doi.org/10.1111/j.1600-0838.2007.00654.x> PMID: 17490456
21. Okubo Y, Osuka Y, Jung S, Rafael F, Tsujimoto T, Aiba T, et al. Walking can be more effective than balance training in fall prevention among community-dwelling older adults. *Geriatr Gerontol Int*. 2016;16(1):118–25. <https://doi.org/10.1111/ggi.12444> PMID: 25613322
22. Wanderley FAC, Oliveira J, Mota J, Carvalho J. Effects of a moderate-intensity walking program on blood pressure, body composition and functional fitness in older women: results of a pilot study. *Archives of Exercise in Health and Disease*. 2010;1(2):50–7.
23. Pontes-Silva A, Dibai-Filho AV, de Melo TS, Santos LM, de Souza MC, DeSantana JM, et al. Effects of progressive intensity resistance training on the impact of fibromyalgia: protocol for a blinded randomized controlled trial. *BMC Musculoskelet Disord*. 2023;24(1):816. <https://doi.org/10.1186/s12891-023-06952-3> PMID: 37838712
24. Silva AC, Pereira MA, Peixoto LM, Rosse IC, Júnior JBF, de Oliveira EC, et al. 12 weeks of resistance training with progressive intensity improves the diagnostic parameters of sarcopenia in individuals of advanced age. *Geriatric Nursing*. 2023;54:60–5. <https://doi.org/10.1016/j.gerinurse.2023.08.015>
25. Blain H, Jaussent A, Picot M-C, Maimoun L, Coste O, Masud T, et al. Effect of a 6-month brisk walking program on walking endurance in sedentary and physically deconditioned women aged 60 or older: a randomized trial. *J Nutr Health Aging*. 2017;21(10):1183–9. <https://doi.org/10.1007/s12603-017-0955-7> PMID: 29188878
26. Campbell MK, Elbourne DR, Altman DG, CONSORT group. CONSORT statement: extension to cluster randomised trials. *BMJ*. 2004;328(7441):702–8. <https://doi.org/10.1136/bmj.328.7441.702> PMID: 15031246
27. Willan AR, Briggs AH. Power and sample size determination. Statistical analysis of cost-effectiveness data. John Wiley & Sons, Ltd. 2006. p. 93–116.
28. Grundler A, Dazer M, Herzig T. Statistical power analysis in reliability demonstration testing: the probability of test success. *Applied Sciences*. 2022;12(12):6190. <https://doi.org/10.3390/app12126190>
29. Perugini M, Gallucci M, Costantini G. A practical primer to power analysis for simple experimental designs. *International Review of Social Psychology*. 2018;31(1):1–23.
30. Health Partners. Health risks of a sedentary lifestyle and how to make changes. 2023. Accessed 2023 March 14. <https://www.healthpartners.com/blog/health-risks-of-sedentary-lifestyle/>
31. Reed JL, Pipe AL. Practical Approaches to prescribing physical activity and monitoring exercise intensity. *Can J Cardiol*. 2016;32(4):514–22. <https://doi.org/10.1016/j.cjca.2015.12.024> PMID: 26897182
32. Canadian Society for Exercise Physiology. PAR-Q & YOU (A Questionnaire for People Aged 15 to 69). Physical Activity Readiness Questionnaire - PAR-Q (revised 2002). 2002. Accessed 2026 June 11. <http://www.csep.ca/CMFiles/publications/parq/par-q.pdf>
33. Chodzko-Zajko WJ. ACSM's exercise for older adults. In: Chodzko-Zajko WJ, ed. ACSM's Exercise for Older Adults. Lippincott Williams & Wilkins. 2013. 1–237.
34. Tanaka H, Monahan KD, Seals DR. Age-predicted maximal heart rate revisited. *J Am Coll Cardiol*. 2001;37(1):153–6. [https://doi.org/10.1016/s0735-1097\(00\)01054-8](https://doi.org/10.1016/s0735-1097(00)01054-8) PMID: 11153730
35. Ritchie C. Rating of perceived exertion (RPE). *J Physiother*. 2012;58(1):62. [https://doi.org/10.1016/S1836-9553\(12\)70078-4](https://doi.org/10.1016/S1836-9553(12)70078-4) PMID: 22341388
36. American College of Sports Medicine. ACSM's health-related physical fitness assessment manual. Lippincott Williams & Wilkins. 2013. p. 10–50.
37. General Administration of Sport of China. National Physical Fitness Standards Manual (Elderly Section). General Administration of Sport of China. 2003. <http://www.sport.gov.cn/qts/n4986/c670121/content.html>
38. Rikli RE, Jones CJ. Senior fitness test manual. 2nd ed. United States of America: Human Kinetics. 2013.
39. American College of Sports Medicine. Guidelines for exercise testing and prescription. 9th ed. Lippincott Williams & Wilkins. 2014.
40. Diener D. Validity And reliability of a one-minute half sit-up test of abdominal strength and endurance. *sports medicine. Training and Rehabilitation*. 1995;6(2):105–9.
41. Middel B, van Sonderen E. Statistical significant change versus relevant or important change in (quasi) experimental design: some conceptual and methodological problems in estimating magnitude of intervention-related change in health services research. *Int J Integr Care*. 2002;2:e15. <https://doi.org/10.5334/ijic.65> PMID: 16896390

42. Herrod PJJ, Doleman B, Blackwell JEM, O'Boyle F, Williams JP, Lund JN, et al. Exercise and other nonpharmacological strategies to reduce blood pressure in older adults: a systematic review and meta-analysis. *J Am Soc Hypertens*. 2018;12(4):248–67. <https://doi.org/10.1016/j.jash.2018.01.008> PMID: 29496468
43. Åkerberg A, Koshmak G, Johansson A, Lindén M. Heart rate measurement as a tool to quantify sedentary behavior. *Stud Health Technol Inform*. 2015;211:105–10. <https://doi.org/10.3233/978-1-61499-516-6-105> PMID: 25980855
44. Reimers AK, Knapp G, Reimers C-D. Effects of exercise on the resting heart rate: a systematic review and meta-analysis of interventional studies. *J Clin Med*. 2018;7(12):503. <https://doi.org/10.3390/jcm7120503> PMID: 30513777
45. He LI, Wei WR, Can Z. Effects of 12-week brisk walking training on exercise blood pressure in elderly patients with essential hypertension: a pilot study. *Clin Exp Hypertens*. 2018;40(7):673–9. <https://doi.org/10.1080/10641963.2018.1425416> PMID: 29363988
46. Novotová K, Pavlů D, Dvořáčková D, Arnal-Gómez A, Espí-López GV. Influence of walking as physiological training to improve respiratory parameters in the elderly population. *Int J Environ Res Public Health*. 2022;19(13):7995. <https://doi.org/10.3390/ijerph19137995> PMID: 35805648
47. Goodpaster BH, Park SW, Harris TB, Kritchevsky SB, Nevitt M, Schwartz AV, et al. The loss of skeletal muscle strength, mass, and quality in older adults: the health, aging and body composition study. *J Gerontol A Biol Sci Med Sci*. 2006;61(10):1059–64. <https://doi.org/10.1093/gerona/61.10.1059> PMID: 17077199
48. Visser M, Harris TB. Body composition and aging. *The Epidemiology of Aging*. Springer Netherlands. 2012. p. 275–92. [https://doi.org/10.1007/978-94-007-5061-6\\_16](https://doi.org/10.1007/978-94-007-5061-6_16)
49. Raziani Y, Raziani S. Investigating the predictors of overweight and obesity in children. *Int J Adv Stud Human Soc Sci*. 2020;9(4):262–80.
50. Chooi YC, Ding C, Magkos F. The epidemiology of obesity. *Metabolism*. 2019;92:6–10. <https://doi.org/10.1016/j.metabol.2018.09.005> PMID: 30253139
51. Öztürk ZA, Türkbeyler İH, Abiyev A, Kul S, Edizer B, Yakaryılmaz FD, et al. Health-related quality of life and fall risk associated with age-related body composition changes; sarcopenia, obesity and sarcopenic obesity. *Intern Med J*. 2018;48(8):973–81. <https://doi.org/10.1111/imj.13935> PMID: 29665258
52. Kusneniwar GN, Jammy GR, Shailendra D, Bunker CH, Reddy PS. Which obesity index is a better predictor for cardiometabolic risk factors in a young adult rural population of Telangana State, India?. *J Family Med Prim Care*. 2020;9(9):4667–72. <https://doi.org/10.4103/jfmpc.jfmpc.864.20> PMID: 33209781
53. Guo Y, Shi H, Yu D, Qiu P. Health benefits of traditional Chinese sports and physical activity for older adults: a systematic review of evidence. *J Sport Health Sci*. 2016;5(3):270–80. <https://doi.org/10.1016/j.jshs.2016.07.002> PMID: 30356513
54. Mabire L, Mani R, Liu L, Mulligan H, Baxter D. The influence of age, sex and body mass index on the effectiveness of brisk walking for obesity management in adults: a systematic review and meta-analysis. *J Phys Act Health*. 2017;14(5):389–407. <https://doi.org/10.1123/jpah.2016-0064> PMID: 28169568
55. Helms ER, Prnjak K, Linardon J. Towards a sustainable nutrition paradigm in physique sport: a narrative review. *Sports*. 2019;7(7):172.
56. Stathokostas L, McDonald MW, Little RMD, Paterson DH. Flexibility of older adults aged 55–86 years and the influence of physical activity. *J Aging Res*. 2013;2013:743843. <https://doi.org/10.1155/2013/743843> PMID: 23862064
57. Sobrinho ACS, Benjamim CJR, Luciano de Almeida M, Rodrigues G da S, Feitosa Lopes LG, Ribeiro de Lima JG, et al. Fourteen weeks of multi-component training associated with flexibility training modifies postural alignment, joint range of motion and modulates blood pressure in physically inactive older women: a randomized clinical trial. *Front Physiol*. 2023;14:1172780. <https://doi.org/10.3389/fphys.2023.1172780> PMID: 38028788
58. Samuel D, Wilson K, Martin HJ, Allen R, Sayer AA, Stokes M. Age-associated changes in hand grip and quadriceps muscle strength ratios in healthy adults. *Aging Clin Exp Res*. 2012;24(3):245–50. <https://doi.org/10.1007/BF03325252> PMID: 23114550
59. Reeve TE 4th, Ur R, Craven TE, Kaan JH, Goldman MP, Edwards MS, et al. Grip strength measurement for frailty assessment in patients with vascular disease and associations with comorbidity, cardiac risk, and sarcopenia. *J Vasc Surg*. 2018;67(5):1512–20. <https://doi.org/10.1016/j.jvs.2017.08.078> PMID: 29276105
60. Yorke AM, Curtis AB, Shoemaker M, Vangsnes E. The impact of multimorbidity on grip strength in adults age 50 and older: data from the health and retirement survey (HRS). *Arch Gerontol Geriatr*. 2017;72:164–8. <https://doi.org/10.1016/j.archger.2017.05.011> PMID: 28667843
61. Cheung C-L, Nguyen U-SDT, Au E, Tan KCB, Kung AWC. Association of handgrip strength with chronic diseases and multimorbidity. *AGE*. 2012;35(3):929–41. <https://doi.org/10.1007/s11357-012-9385-y>
62. Lu Y, Li G, Ferrari P, Freisling H, Qiao Y, Wu L, et al. Associations of handgrip strength with morbidity and all-cause mortality of cardiometabolic multimorbidity. *BMC Med*. 2022;20(1):191. <https://doi.org/10.1186/s12916-022-02389-y> PMID: 35655218
63. Buckner SL, Dankel SJ, Bell ZW, Abe T, Loenneke JP. The association of handgrip strength and mortality: What does it tell us and what can we do with it? *Rejuvenation Research*. 2019;22(3):230–4.
64. Yoo EJ, Jun TW, Hawkins SA. The effects of a walking exercise program on fall-related fitness, bone metabolism, and fall-related psychological factors in elderly women. *Res Sports Med*. 2010;18(4):236–50. <https://doi.org/10.1080/15438627.2010.510098> PMID: 21058209
65. Padilla Colón CJ, Molina-Vicenty IL, Frontera-Rodríguez M, García-Ferré A, Rivera BP, Cintrón-Vélez G, et al. Muscle and bone mass loss in the elderly population: advances in diagnosis and treatment. *J Biomed (Syd)*. 2018;3:40–9. <https://doi.org/10.7150/jbm.23390> PMID: 30505650

66. Parikh C, Arora M. Muscular Endurance comparison between Indian collegiate students playing recreational sports and those who are sedentary: An observational study. *Int J Therapies Rehabil Res.* 2017;6(2):211. <https://doi.org/10.5455/ijtr.000000267>
67. Scuccato R. Falls in the elderly. *Recenti Prog Med.* 2018;109(7):401–4. <https://doi.org/10.1701/2955.29711> PMID: 30087505
68. Pitchai P, Dedhia HB, Bhandari N, Krishnan D, D'Souza NRJ, Bellara JM. Prevalence, risk factors, circumstances for falls and level of functional independence among geriatric population - A descriptive study. *Indian J Public Health.* 2019;63(1):21–6. [https://doi.org/10.4103/ijph.IJPH\\_332\\_17](https://doi.org/10.4103/ijph.IJPH_332_17) PMID: 30880733
69. Delgado-Gonzalo R, Renevey P, Lemkaddem A, Lemay M, Solà J, Korhonen I. *Seamless Healthcare Monitoring: Advancements in Wearable, Attachable, and Invisible Devices.* Cham: Springer. 2017. 413–55.
70. Lund C, Dalgas U, Grønberg TK, Andersen H, Severinsen K, Riemenschneider M, et al. Balance and walking performance are improved after resistance and aerobic training in persons with chronic stroke. *Disabil Rehabil.* 2018;40(20):2408–15. <https://doi.org/10.1080/09638288.2017.1336646> PMID: 28597708
71. Audette JF, Jin YS, Newcomer R, Stein L, Duncan G, Frontera WR. Tai Chi versus brisk walking in elderly women. *Age Ageing.* 2006;35(4):388–93. <https://doi.org/10.1093/ageing/af1006> PMID: 16624847
72. Paillard T, Lafont C, Costes-Salon MC, Rivière D, Dupui P. Effects of brisk walking on static and dynamic balance, locomotion, body composition, and aerobic capacity in ageing healthy active men. *Int J Sports Med.* 2004;25(7):539–46. <https://doi.org/10.1055/s-2004-820948> PMID: 15459836
73. Song Q-H, Zhang Q-H, Xu R-M, Ma M, Zhao X-P, Shen G-Q, et al. Effect of Tai-chi exercise on lower limb muscle strength, bone mineral density and balance function of elderly women. *Int J Clin Exp Med.* 2014;7(6):1569–76. PMID: 25035781
74. Okubo Y, Osuka Y, Jung S, Rafael F, Tsujimoto T, Aiba T, et al. Walking can be more effective than balance training in fall prevention among community-dwelling older adults. *Geriatr Gerontol Int.* 2016;16(1):118–25. <https://doi.org/10.1111/ggi.12444> PMID: 25613322
75. Lee I-H, Park S-Y. Balance improvement by strength training for the elderly. *J Phys Ther Sci.* 2013;25(12):1591–3. <https://doi.org/10.1589/jpts.25.1591> PMID: 24409027
76. Szymczak M, Oszkinis G, Majchrzycki M. The Impact of walking exercises and resistance training upon the walking distance in patients with chronic lower limb ischaemia. *BioMed Research International.* 2016;2016:1–8.
77. Marques E, Carvalho J, Pizarro A, Wanderlay F, Mota J. The influence of physical activity, body composition, and lower extremity strength on walking ability. *Motor Control.* 2011;15(4):494–506. <https://doi.org/10.1123/mcj.15.4.494> PMID: 22113093
78. Graf A, Judge JO, Ounpuu S, Thelen DG. The effect of walking speed on lower-extremity joint powers among elderly adults who exhibit low physical performance. *Arch Phys Med Rehabil.* 2005;86(11):2177–83. <https://doi.org/10.1016/j.apmr.2005.06.007> PMID: 16271567
79. Wu R, Zhang Y, Bai J-J, Sun J, Bao Z-J, Wang Z. Impact of lower limb muscle strength on walking function beyond aging and diabetes. *J Int Med Res.* 2020;48(6):300060520928826. <https://doi.org/10.1177/0300060520928826> PMID: 32589863
80. Lim HJ, Min DK, Thorpe L, Lee CH. Trajectories of life satisfaction and their predictors among Korean older adults. *BMC Geriatr.* 2017;17(1):89. <https://doi.org/10.1186/s12877-017-0485-5> PMID: 28420335
81. An H-Y, Chen W, Wang C-W, Yang H-F, Huang W-T, Fan S-Y. The relationships between physical activity and life satisfaction and happiness among young, middle-aged, and older adults. *Int J Environ Res Public Health.* 2020;17(13):4817. <https://doi.org/10.3390/ijerph17134817> PMID: 32635457
82. Sudha R, Arun K, Akansha G. Life satisfaction and life orientation as predictors of psychological well being. *Int J Indian Psychol.* 2015;3(1). <https://doi.org/10.25215/0301.113>
83. Kutubaeva RZh. Analysis of life satisfaction of the elderly population on the example of Sweden, Austria and Germany. *POPECON.* 2019;3(3):102–16. <https://doi.org/10.3897/popecon.3.e47192>
